# Supplementary material
Source: bioRxiv or medRxiv preprint supplement (http://medrxiv.stage.highwire.org/highwire/filestream/70611/field_highwire_adjunct_files/0/2019.12.10.19014282-1.pdf)
Supplement: Supplementary file [file 2019.12.10.19014282-1.pdf]

# **Supplementary Information for: Clustering of susceptible individuals within households can drive an outbreak: an individual-based model exploration**

**Elise Kuylen<sup>1,2,\*</sup>, Lander Willem<sup>1</sup>, Jan Broeckhove<sup>3</sup>, Philippe Beutels<sup>1</sup>, and Niel Hens<sup>1,4</sup>**

<sup>1</sup>Centre for Health Economics Research and Modelling Infectious Diseases (CHERMID), Vaccine and Infectious Disease Institute, University of Antwerp, Antwerp, Belgium

<sup>2</sup>Discipline Group Computer Sciences, Hasselt University, Hasselt, Belgium

<sup>3</sup>IDLab, Department of Mathematics and Computer Science, University of Antwerp, Antwerp, Belgium

<sup>4</sup>I-BioStat, Data Science Institute, Hasselt University, Hasselt, Belgium

\*[elise.kuylen@uantwerpen.be](mailto:elise.kuylen@uantwerpen.be)

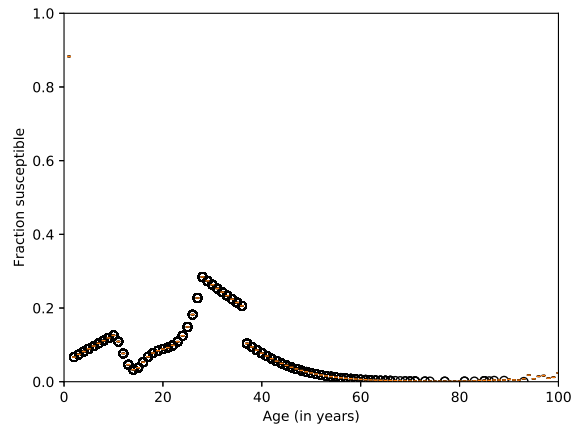

(a) Clustering level = 0.00

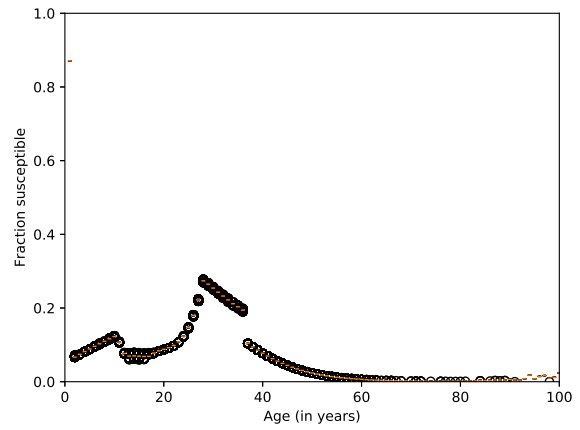

(b) Clustering level = 0.25

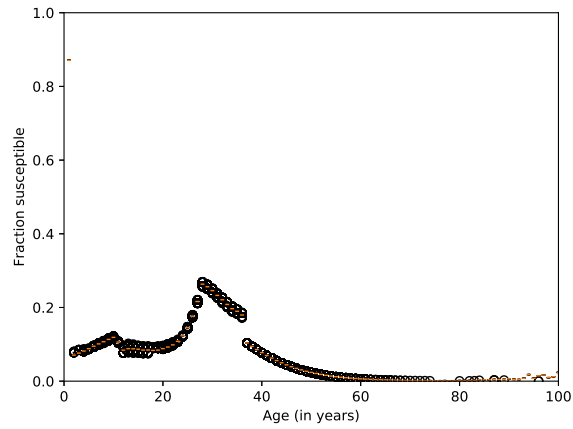

(c) Clustering level = 0.50

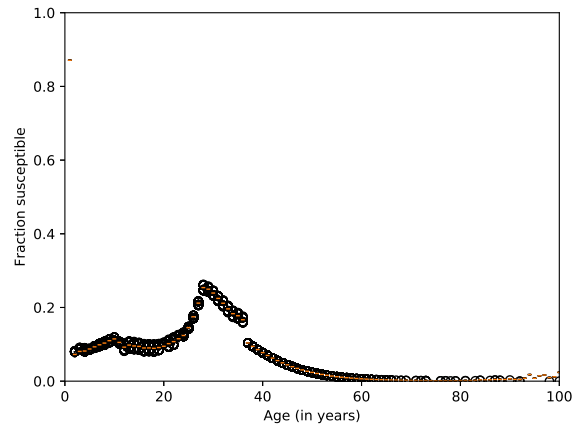

(d) Clustering level = 0.75

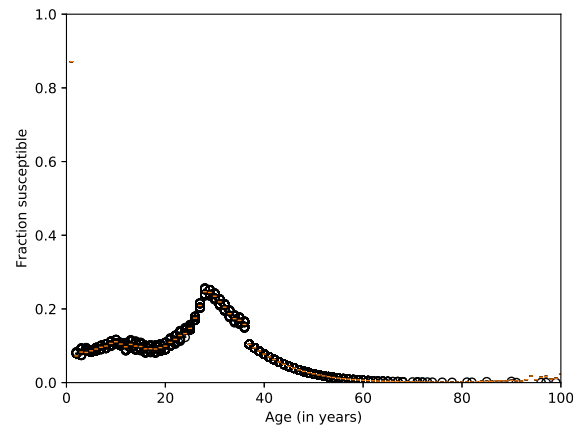

(e) Clustering level = 1.00

**Supplementary Figure S1.** Box-plots of immunity levels by age for target clustering levels 0.00, 0.25, 0.50, 0.75 and 1.00, each over 13,000 stochastic simulations.

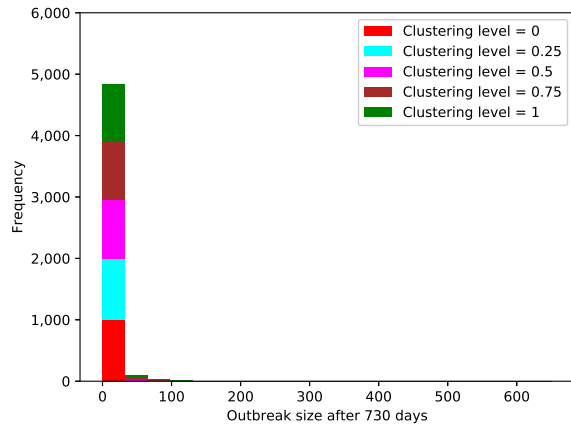

(a) Transmission probability = 0.20 ( $\hat{R}_0 = 6.80$ )

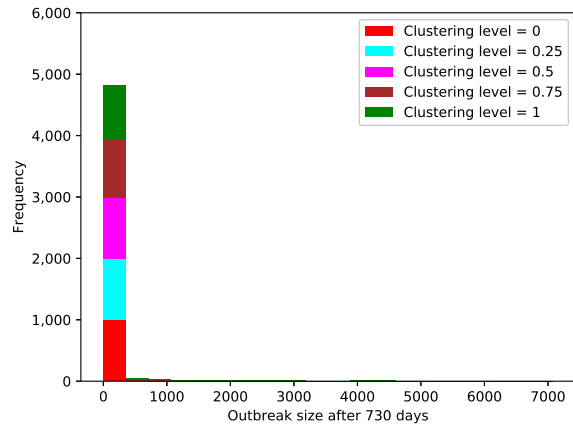

(b) Transmission probability = 0.25 ( $\hat{R}_0 = 8.38$ )

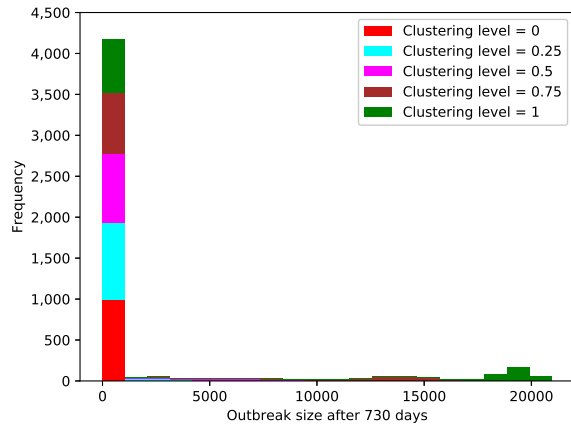

(c) Transmission probability = 0.30 ( $\hat{R}_0 = 9.91$ )

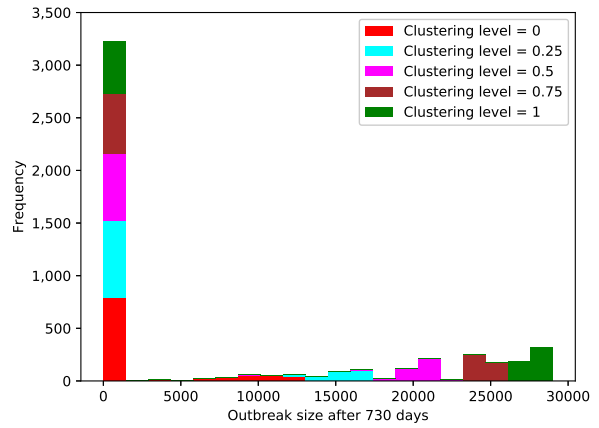

(d) Transmission probability = 0.35 ( $\hat{R}_0 = 11.38$ )

**Supplementary Figure S2.** Histograms of frequencies of outbreak sizes for clustering levels 0, 0.25, 0.5, 0.75, and 1 over transmission probabilities from 0.20 ( $\hat{R}_0 = 6.80$ ) to 0.35 ( $\hat{R}_0 = 11.38$ ). Results over 1,000 stochastic simulations per combination of transmission probability and clustering level.

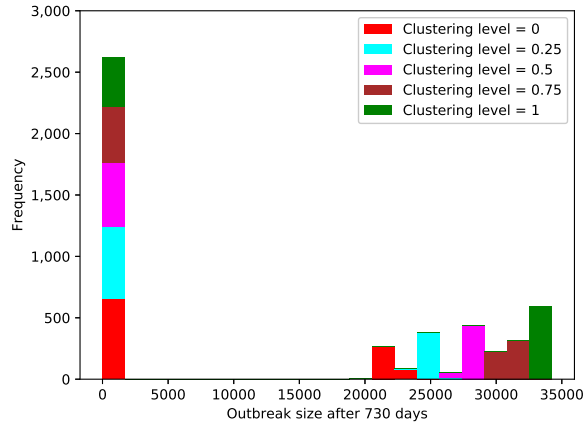

(a) Transmission probability = 0.40 ( $\hat{R}_0 = 12.80$ )

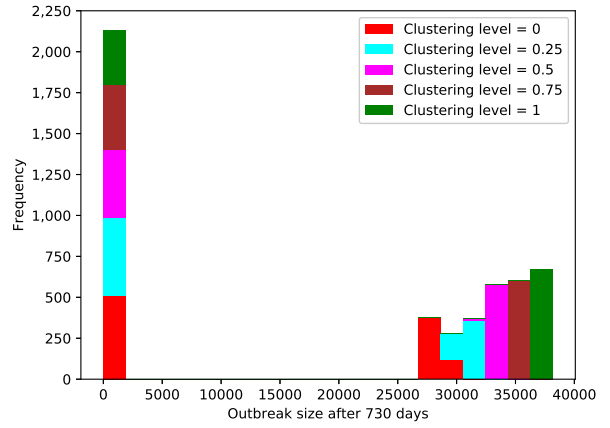

(b) Transmission probability = 0.45 ( $\hat{R}_0 = 14.16$ )

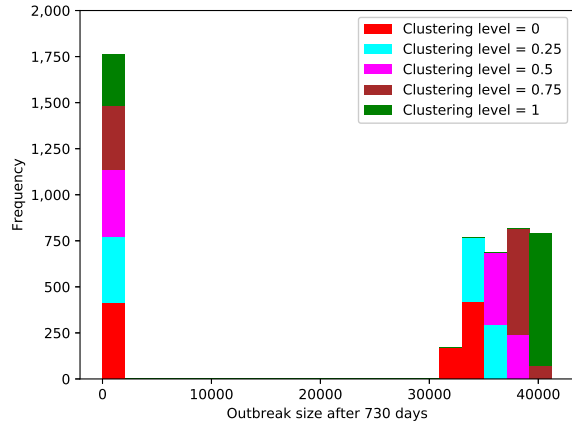

(c) Transmission probability = 0.50 ( $\hat{R}_0 = 15.48$ )

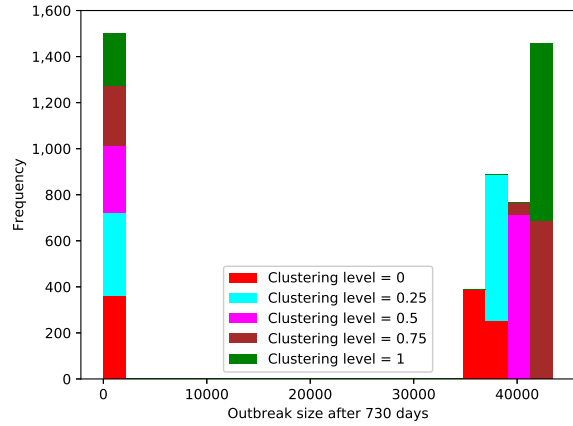

(d) Transmission probability = 0.55 ( $\hat{R}_0 = 16.76$ )

**Supplementary Figure S3.** Histograms of frequencies of outbreak sizes for clustering levels 0, 0.25, 0.5, 0.75, and 1 over transmission probabilities from 0.40 ( $\hat{R}_0 = 12.80$ ) to 0.55 ( $\hat{R}_0 = 16.76$ ). Results over 1,000 stochastic simulations per combination of transmission probability and clustering level.

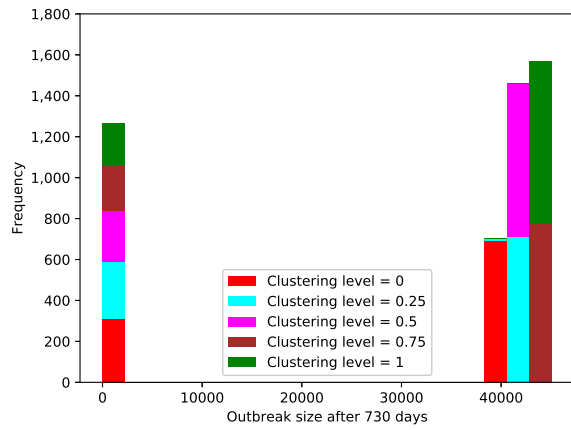

(a) Transmission probability = 0.60 ( $\hat{R}_0 = 17.99$ )

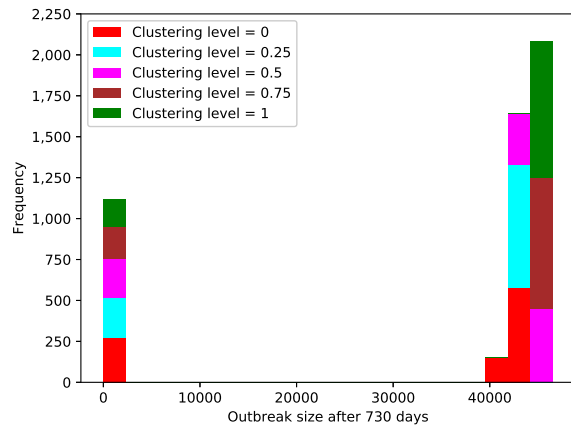

(b) Transmission probability = 0.65 ( $\hat{R}_0 = 19.19$ )

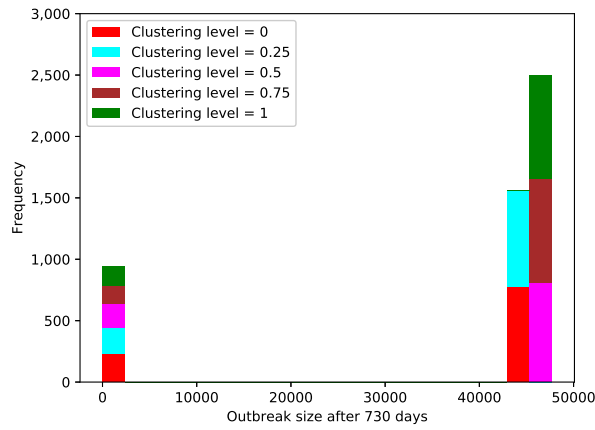

(c) Transmission probability = 0.70 ( $\hat{R}_0 = 20.35$ )

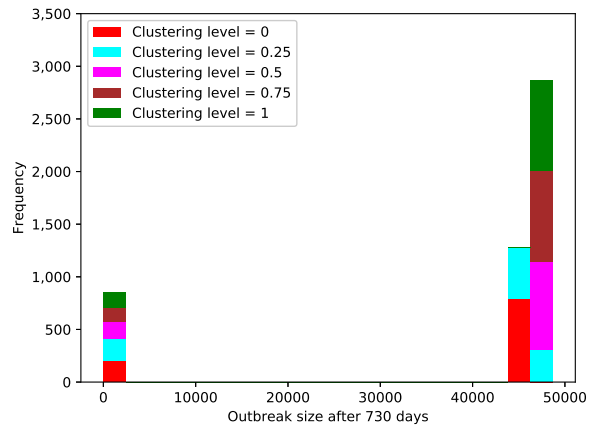

(d) Transmission probability = 0.75 ( $\hat{R}_0 = 21.48$ )

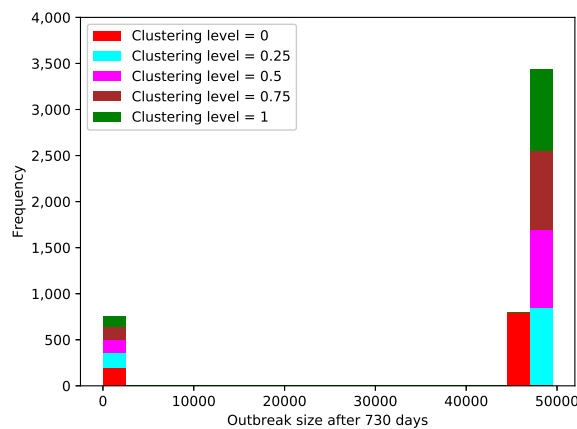

(e) Transmission probability = 0.80 ( $\hat{R}_0 = 22.58$ )

**Supplementary Figure S4.** Histograms of frequencies of outbreak sizes for clustering levels 0, 0.25, 0.5, 0.75, and 1 over transmission probabilities from 0.60 ( $\hat{R}_0 = 17.99$ ) to 0.80 ( $\hat{R}_0 = 22.58$ ). Results over 1,000 stochastic simulations per combination of transmission probability and clustering level.

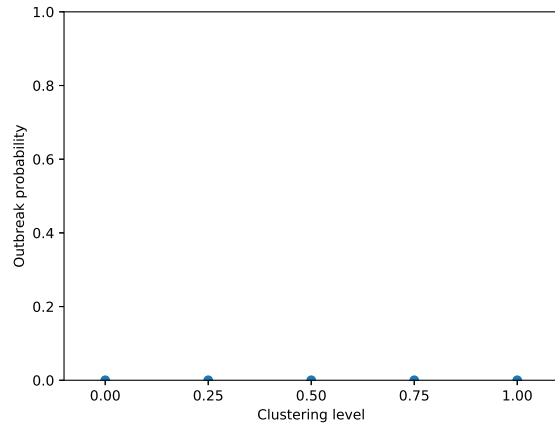

(a) Transmission probability = 0.20 ( $\hat{R}_0 = 6.80$ )

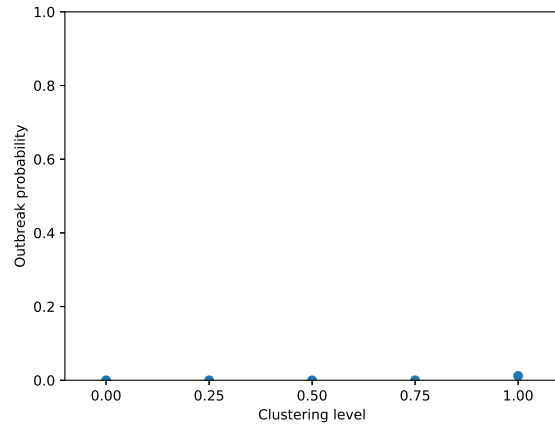

(b) Transmission probability = 0.25 ( $\hat{R}_0 = 8.38$ )

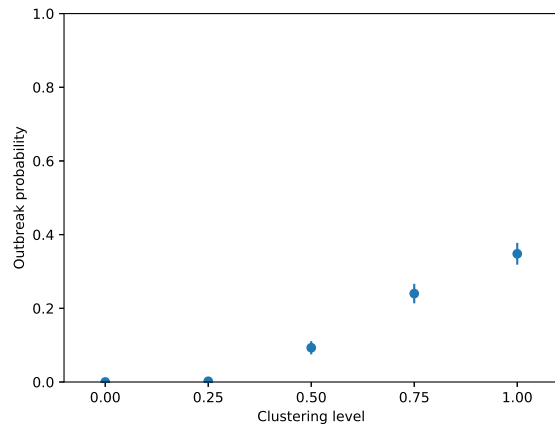

(c) Transmission probability = 0.30 ( $\hat{R}_0 = 9.91$ )

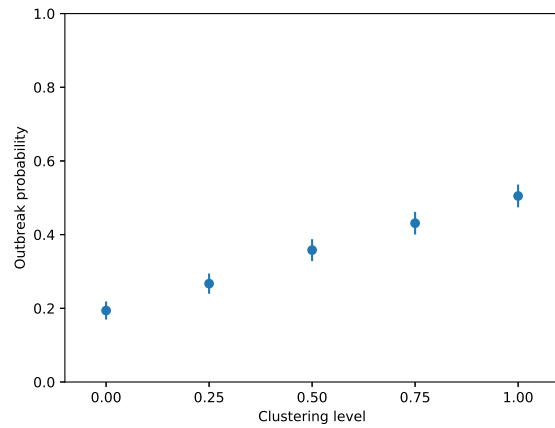

(d) Transmission probability = 0.35 ( $\hat{R}_0 = 11.38$ )

**Supplementary Figure S5.** Probability of the occurrence of a persistent outbreak for clustering levels 0, 0.25, 0.5, 0.75, and 1 over transmission probabilities from 0.20 ( $\hat{R}_0 = 6.80$ ) to 0.35 ( $\hat{R}_0 = 11.38$ ). Results over 1,000 stochastic simulations per combination of transmission probability and clustering level. Error bars indicate 95% confidence intervals, for scenarios where enough (at least 5 of each) persistent outbreaks and extinction cases occurred.

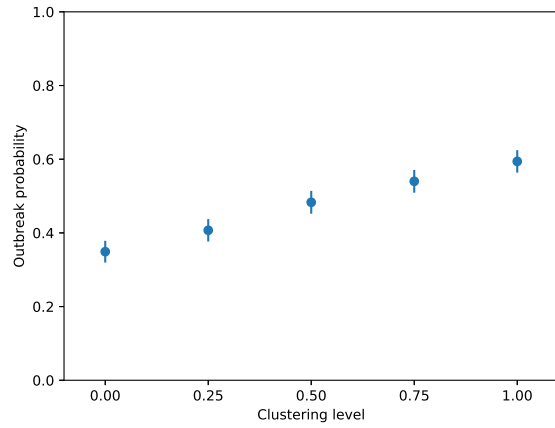

**(a)** Transmission probability = 0.40 ( $\hat{R}_0 = 12.80$ )

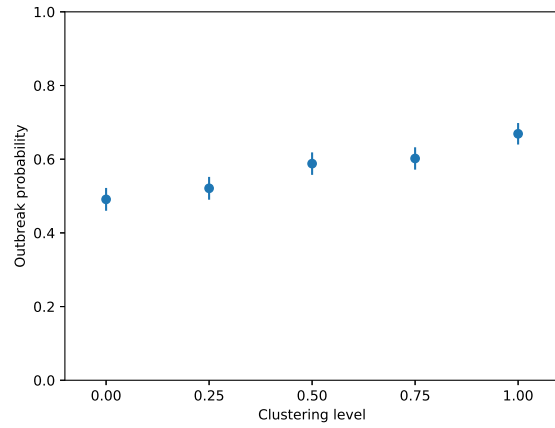

**(b)** Transmission probability = 0.45 ( $\hat{R}_0 = 14.16$ )

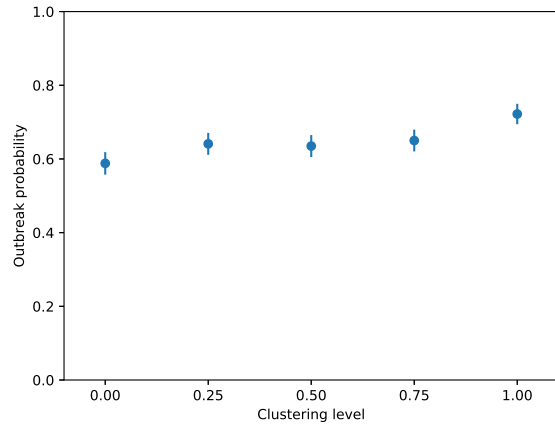

**(c)** Transmission probability = 0.50 ( $\hat{R}_0 = 15.48$ )

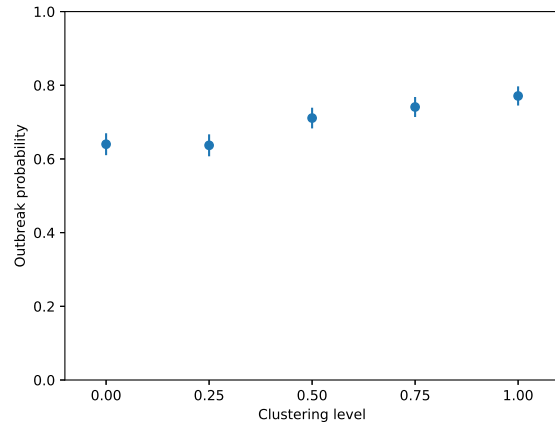

**(d)** Transmission probability = 0.55 ( $\hat{R}_0 = 16.76$ )

**Supplementary Figure S6.** Probability of the occurrence of a persistent outbreak for clustering levels 0, 0.25, 0.5, 0.75, and 1 over transmission probabilities from 0.40 ( $\hat{R}_0 = 12.80$ ) to 0.55 ( $\hat{R}_0 = 16.76$ ). Results over 1,000 stochastic simulations per combination of transmission probability and clustering level. Error bars indicate 95% confidence intervals, for scenarios where enough (at least 5 of each) persistent outbreaks and extinction cases occurred.

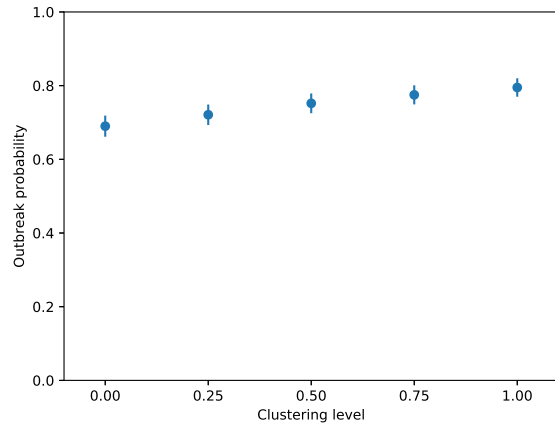

(a) Transmission probability = 0.60 ( $\hat{R}_0 = 17.99$ )

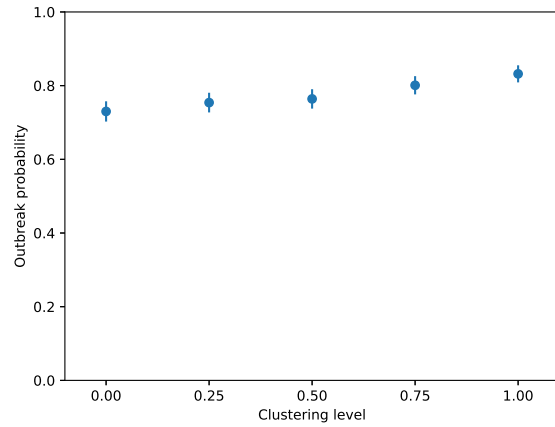

(b) Transmission probability = 0.65 ( $\hat{R}_0 = 19.19$ )

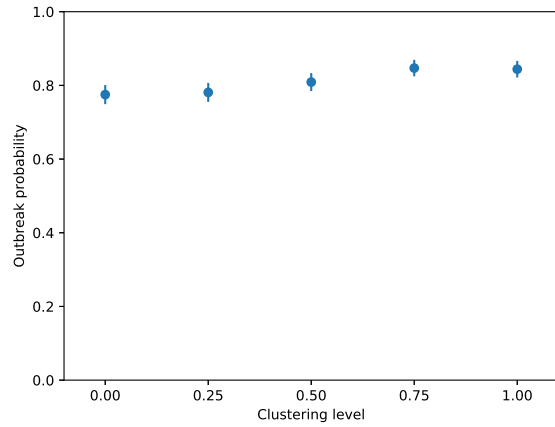

(c) Transmission probability = 0.70 ( $\hat{R}_0 = 20.35$ )

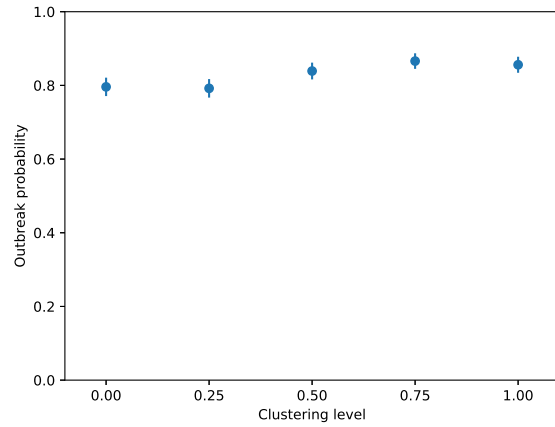

(d) Transmission probability = 0.75 ( $\hat{R}_0 = 21.48$ )

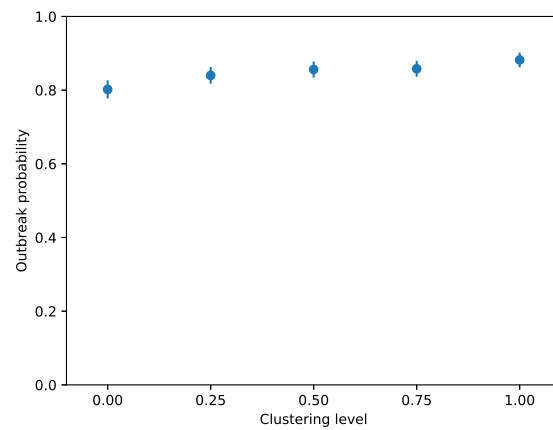

(e) Transmission probability = 0.80 ( $\hat{R}_0 = 22.58$ )

**Supplementary Figure S7.** Probability of the occurrence of a persistent outbreak for clustering levels 0, 0.25, 0.5, 0.75, and 1 over transmission probabilities from 0.60 ( $\hat{R}_0 = 17.99$ ) to 0.80 ( $\hat{R}_0 = 22.58$ ). Results over 1,000 stochastic simulations per combination of transmission probability and clustering level. Error bars indicate 95% confidence intervals, for scenarios where enough (at least 5 of each) persistent outbreaks and extinction cases occurred.



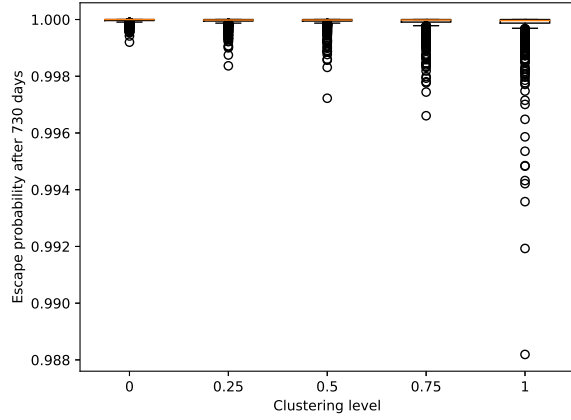

(a) Transmission probability = 0.20 ( $\hat{R}_0 = 6.80$ )

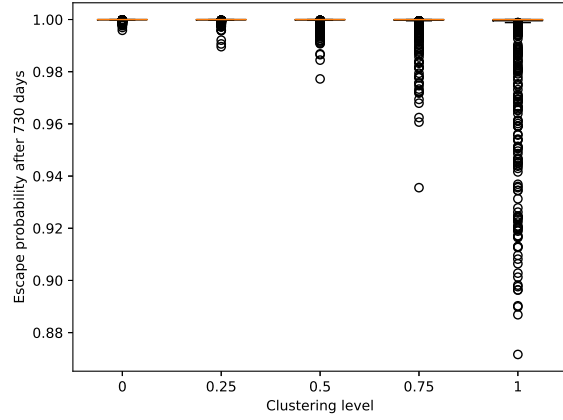

(b) Transmission probability = 0.25 ( $\hat{R}_0 = 8.38$ )

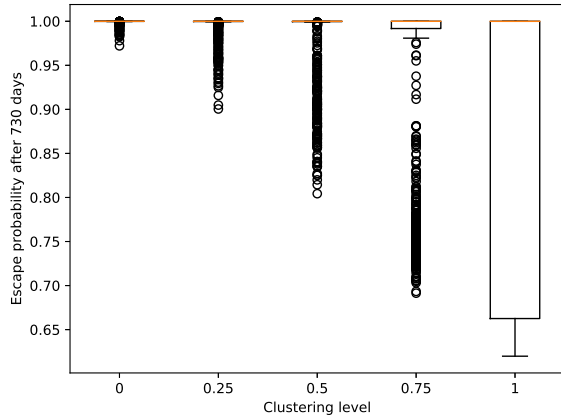

(c) Transmission probability = 0.30 ( $\hat{R}_0 = 9.91$ )

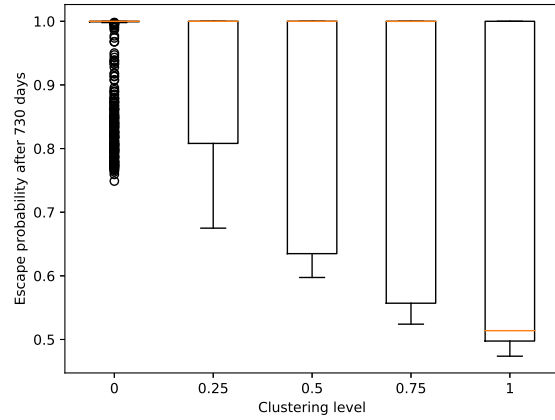

(d) Transmission probability = 0.35 ( $\hat{R}_0 = 11.38$ )

**Supplementary Figure S8.** Box-plots of escape probabilities for clustering levels 0, 0.25, 0.5, 0.75, and 1 over transmission probabilities from 0.20 ( $\hat{R}_0 = 6.80$ ) to 0.35 ( $\hat{R}_0 = 11.38$ ). Results over 1,000 stochastic simulations per combination of transmission probability and clustering level.

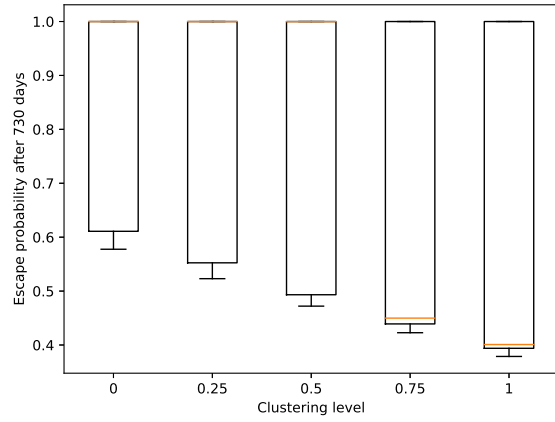

**(a)** Transmission probability = 0.40 ( $\hat{R}_0 = 12.80$ )

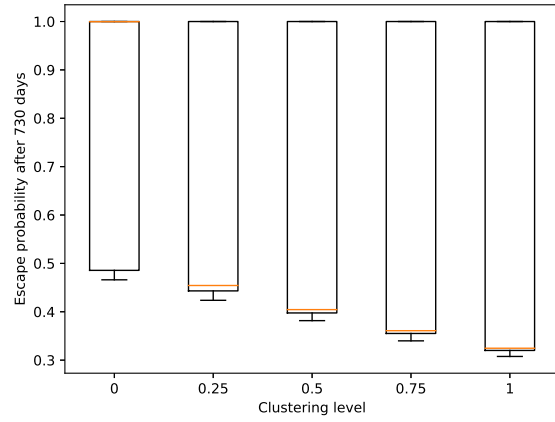

**(b)** Transmission probability = 0.45 ( $\hat{R}_0 = 14.16$ )

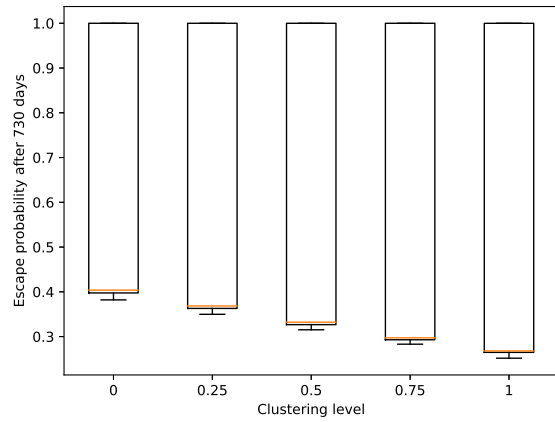

**(c)** Transmission probability = 0.50 ( $\hat{R}_0 = 15.48$ )

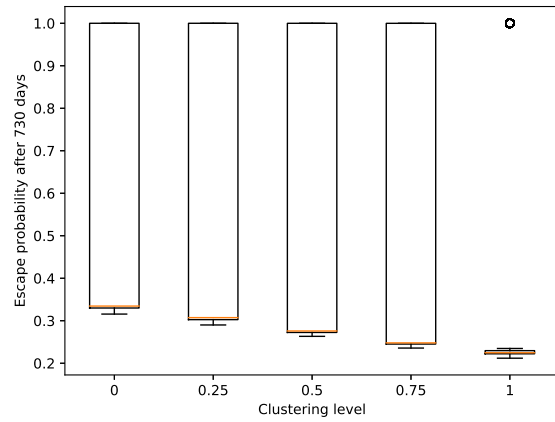

**(d)** Transmission probability = 0.55 ( $\hat{R}_0 = 16.76$ )

**Supplementary Figure S9.** Box-plots of escape probabilities for clustering levels 0, 0.25, 0.5, 0.75, and 1 over transmission probabilities from 0.40 ( $\hat{R}_0 = 12.80$ ) to 0.55 ( $\hat{R}_0 = 16.76$ ). Results over 1,000 stochastic simulations per combination of transmission probability and clustering level.

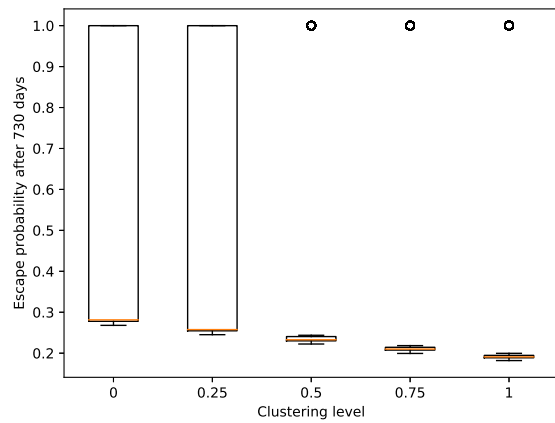

(a) Transmission probability = 0.60 ( $\hat{R}_0 = 17.99$ )

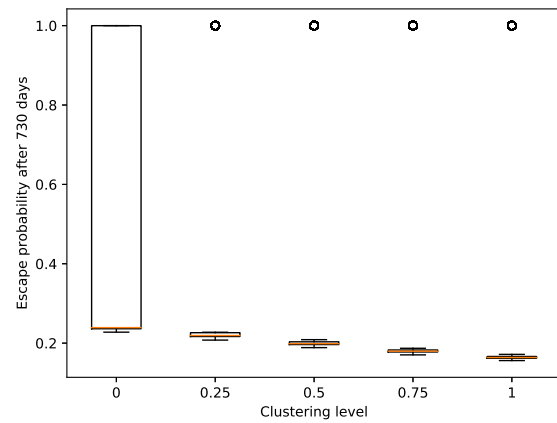

(b) Transmission probability = 0.65 ( $\hat{R}_0 = 19.19$ )

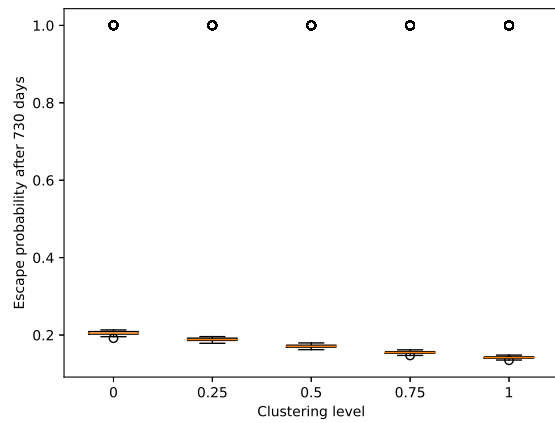

(c) Transmission probability = 0.70 ( $\hat{R}_0 = 20.35$ )

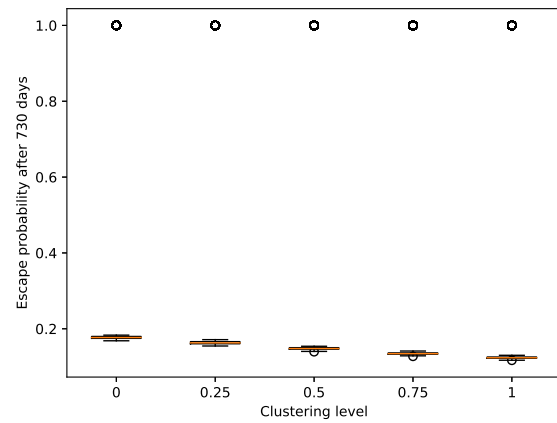

(d) Transmission probability = 0.75 ( $\hat{R}_0 = 21.48$ )

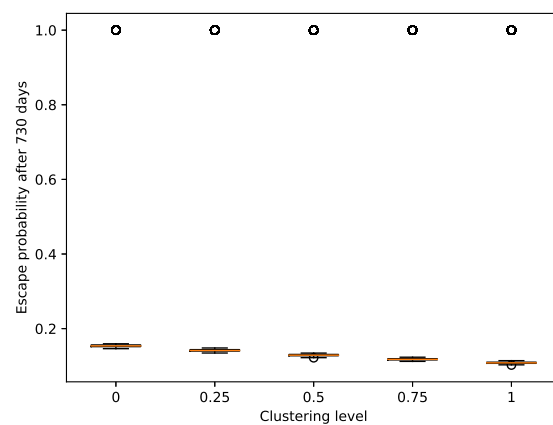

(e) Transmission probability = 0.80 ( $\hat{R}_0 = 22.58$ )

**Supplementary Figure S10.** Box-plots of escape probabilities for clustering levels 0, 0.25, 0.5, 0.75, and 1 over transmission probabilities from 0.60 ( $\hat{R}_0 = 17.99$ ) to 0.80 ( $\hat{R}_0 = 22.58$ ). Results over 1,000 stochastic simulations per combination of transmission probability and clustering level.

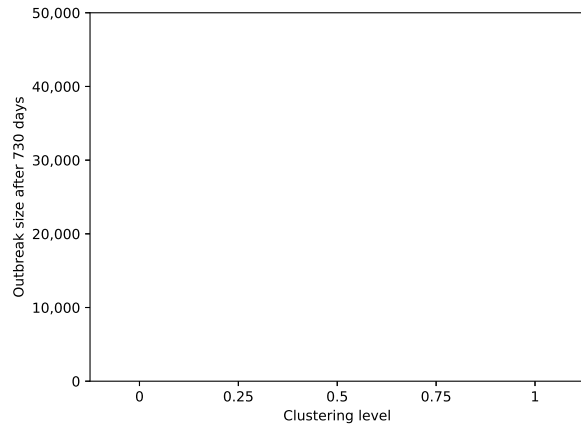

**(a)** Transmission probability = 0.20 ( $\hat{R}_0 = 6.80$ )

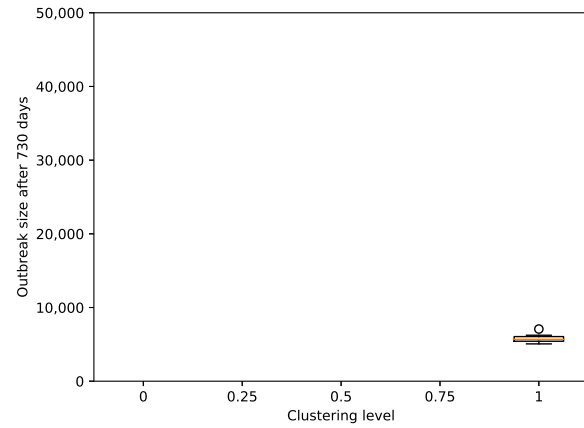

**(b)** Transmission probability = 0.25 ( $\hat{R}_0 = 8.38$ )

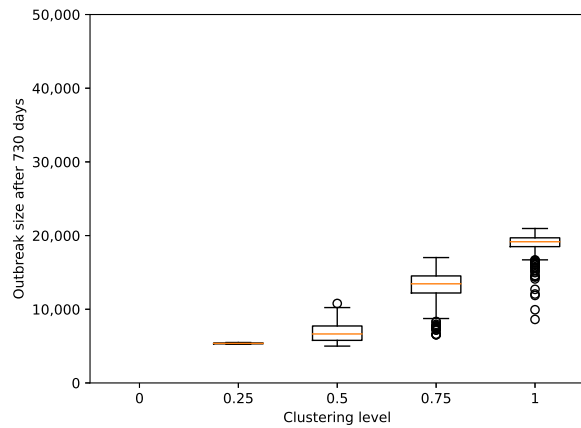

**(c)** Transmission probability = 0.30 ( $\hat{R}_0 = 9.91$ )

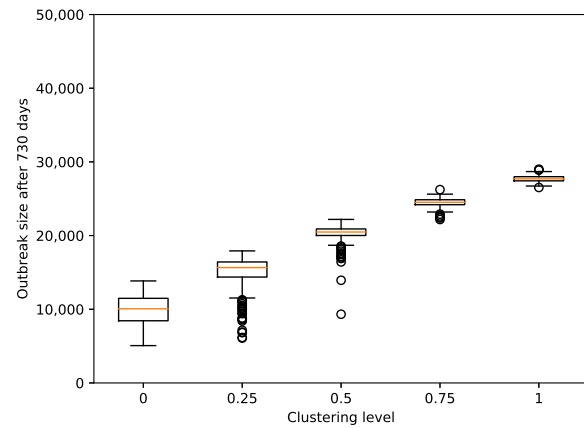

**(d)** Transmission probability = 0.35 ( $\hat{R}_0 = 11.38$ )

**Supplementary Figure S11.** Box-plots of outbreak sizes of persistent outbreaks (extinction threshold = 5,000 cases) for clustering levels 0, 0.25, 0.5, 0.75, and 1 over transmission probabilities from 0.20 ( $\hat{R}_0 = 6.80$ ) to 0.35 ( $\hat{R}_0 = 11.38$ ). Results over 1,000 stochastic simulations per combination of transmission probability and clustering level.

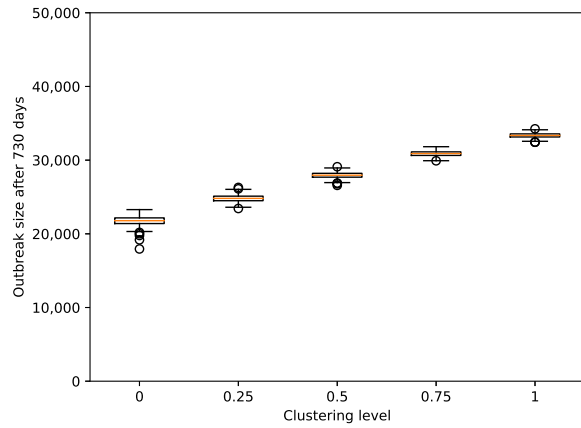

**(a)** Transmission probability = 0.40 ( $\hat{R}_0 = 12.80$ )

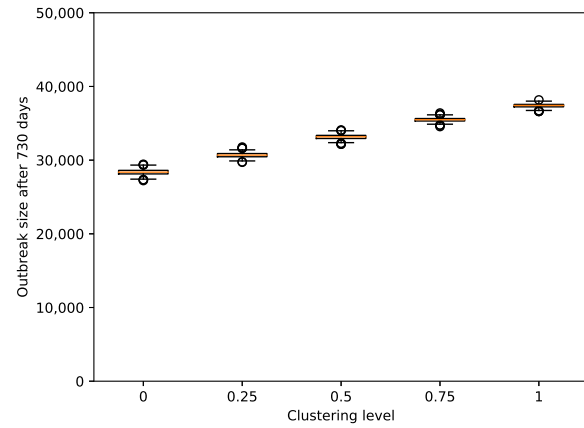

**(b)** Transmission probability = 0.45 ( $\hat{R}_0 = 14.16$ )

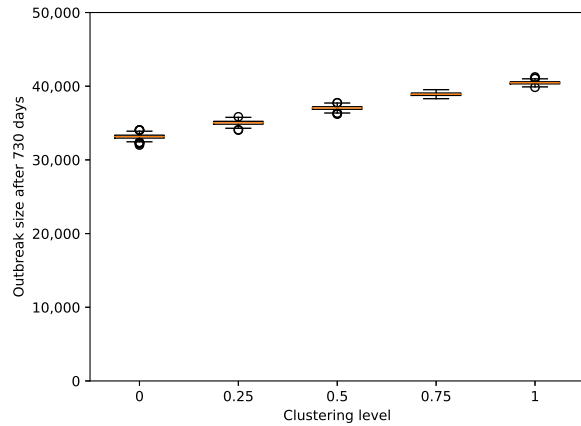

**(c)** Transmission probability = 0.50 ( $\hat{R}_0 = 15.48$ )

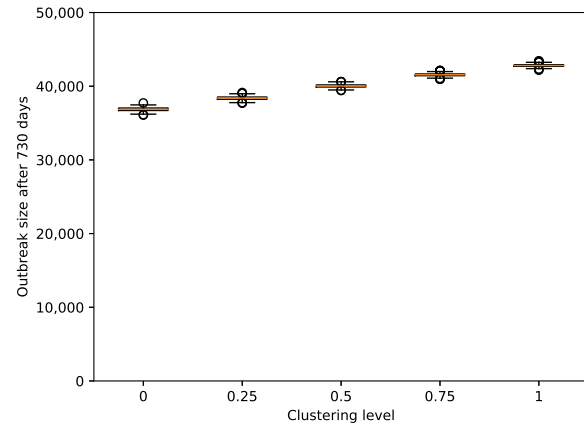

**(d)** Transmission probability = 0.55 ( $\hat{R}_0 = 16.76$ )

**Supplementary Figure S12.** Box-plots of outbreak sizes of persistent outbreaks (extinction threshold = 5,000 cases) for clustering levels 0, 0.25, 0.5, 0.75, and 1 over transmission probabilities from 0.40 ( $\hat{R}_0 = 12.80$ ) to 0.55 ( $\hat{R}_0 = 16.76$ ). Results over 1,000 stochastic simulations per combination of transmission probability and clustering level.

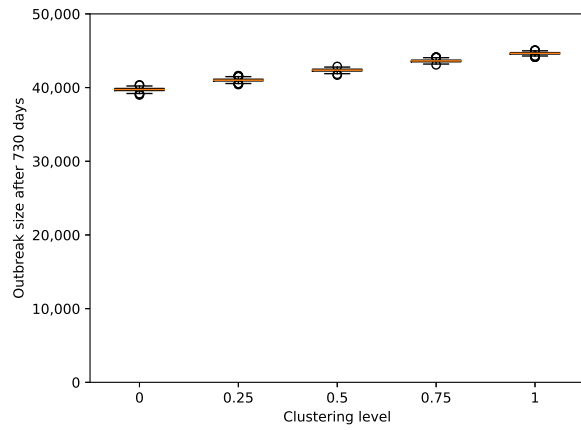

(a) Transmission probability = 0.60 ( $\hat{R}_0 = 17.99$ )

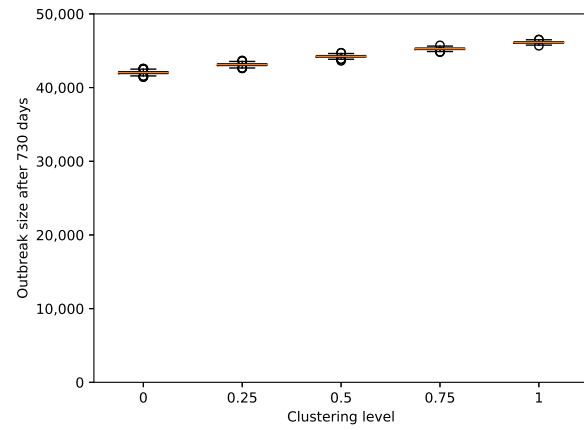

(b) Transmission probability = 0.65 ( $\hat{R}_0 = 19.19$ )

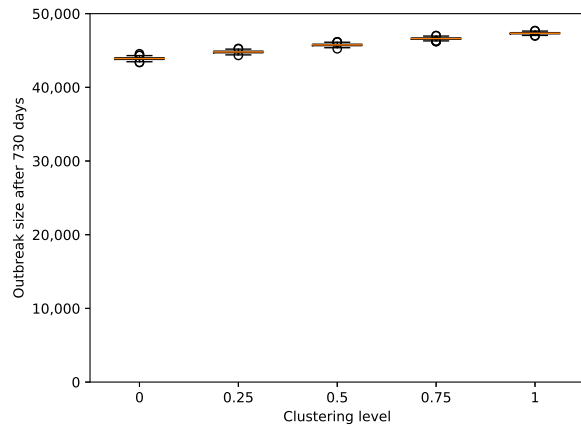

(c) Transmission probability = 0.70 ( $\hat{R}_0 = 20.35$ )

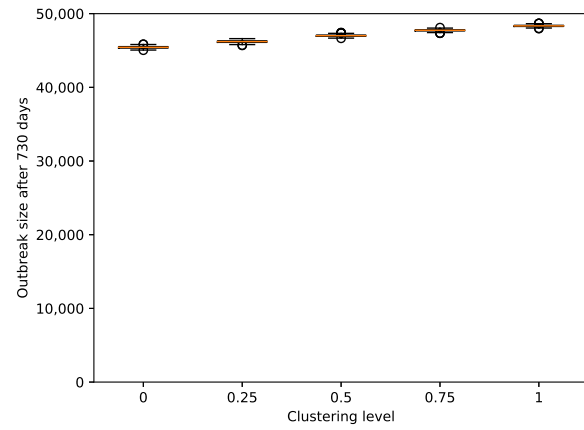

(d) Transmission probability = 0.75 ( $\hat{R}_0 = 21.48$ )

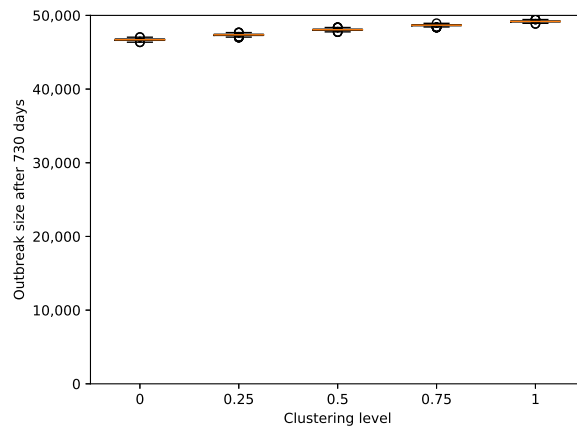

(e) Transmission probability = 0.80 ( $\hat{R}_0 = 22.58$ )

**Supplementary Figure S13.** Box-plots of outbreak sizes of persistent outbreaks (extinction threshold = 5,000 cases) for clustering levels 0, 0.25, 0.5, 0.75, and 1 over transmission probabilities from 0.60 ( $\hat{R}_0 = 17.99$ ) to 0.80 ( $\hat{R}_0 = 22.58$ ). Results over 1,000 stochastic simulations per combination of transmission probability and clustering level.

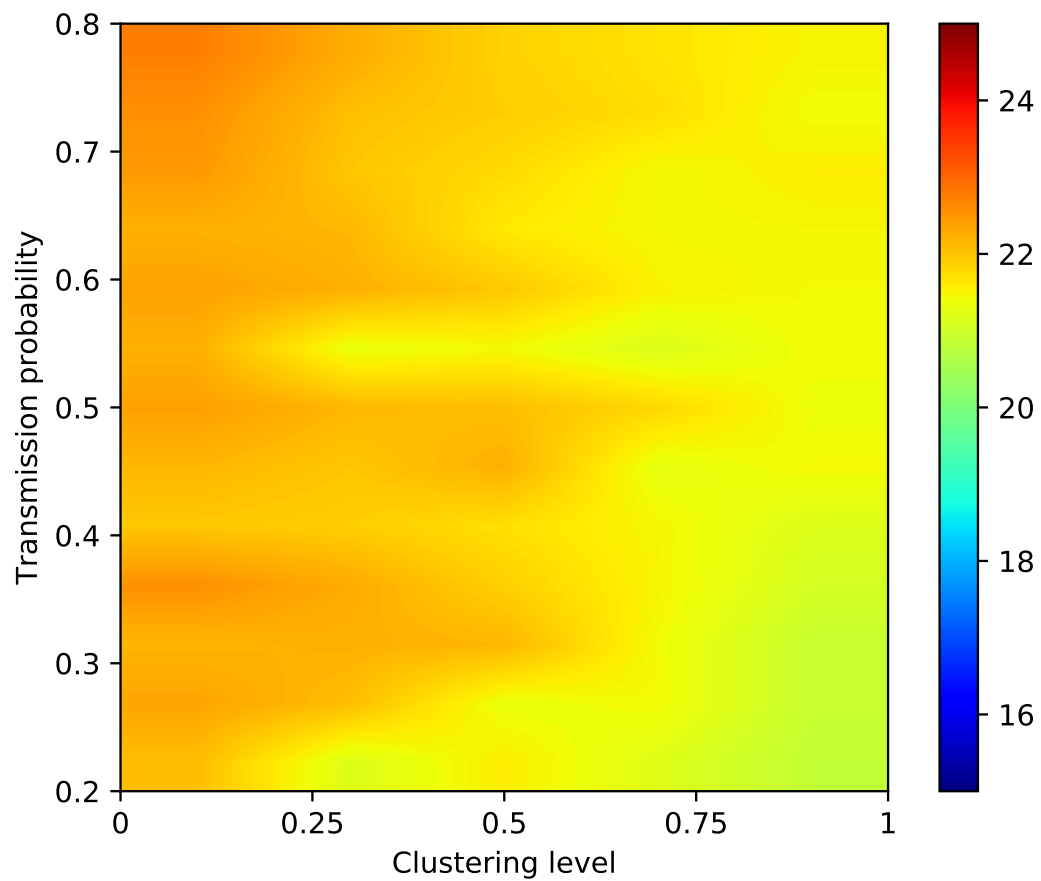

**Supplementary Figure S14.** Average ages of infected individuals for clustering levels 0 to 1 and transmission probabilities 0.2 to 0.8 ( $R_0 \sim 6.80$  to 22.58). We ran 1,000 simulations for each scenario and calculated the average age over all infected individuals.
